# Supplementary material
Source: publisher figshare collection journal article supplement (https://sage.figshare.com/ndownloader/files/12370712)
Supplement: Supplementary file 1 [file 12370712]

APPENDIX

PLEASE FILL IN THE CORRECT ANSWER IN THE CORRESPONDING BUBBLE ON YOUR SCANTRON FORM.

**FACTOR I**

**Post 2. Is there a cure for AIDS?**

1. Yes
2. **No**
3. Only available by prescription
4. Only if you start the treatment right away

**Post 4. HIV can make a person ill because:**

1. it makes a person lose weight very suddenly.
2. it reduces the body’s core temperature.
3. it causes cancer.
4. **it attacks the immune system.**

**Post 5. HIV is believed to have evolved from a similar virus found in which animal?**

1. Chicken
2. **Chimpanzee**
3. Elephant
4. Guinea pig

**Post 10. HIV primarily attacks which of the following?**

1. Muscle cells
2. **White blood cells**
3. Cancer cells
4. All cells throughout the body

**Post 14. What does “CDC” stand for?**

1. **Centers for Disease Control**
2. Central Disease Communication
3. Criminal Disease Center
4. Crime Discovery Center

**Post 15. Is any group or person immune from HIV/AIDS?**

1. **No**
2. Yes

**Post16. What does the immune system do?**

- 1. **Protects against disease**
  2. Rebuilds injured tissue
  3. Carries messages from the brain to the body
  4. Helps with digestion

**FACTOR II**

**Post 22. What are the body’s chief defenders against disease?**

1. **Leukocytes**
2. Erythrocytes
3. Lymph nodes
4. Neurons

**Post 8. Which of the following is not true of viruses?**

1. Viruses invade living cells.
2. Viruses cannot reproduce on their own.
3. Viruses are too small to see with a microscope.
4. **Viruses can be killed with antibiotics.**

**Post 21. Which are typical components of an HIV particle?**

1. Cell membrane, nucleus, cytoplasm
2. **Genetic material, capsid, viral envelope**
3. Cell wall, protoplast, DNA
4. Viral spikes, CD4, nucleus

**FACTOR III**

**Post 1. What is the difference between HIV and AIDS?**

1. HIV is a virus and AIDS is a bacterial disease.
2. There is no difference between HIV and AIDS.
3. **HIV is the virus that causes AIDS.**
4. HIV is a more serious disease than AIDS.

**Post 20. Which country has the highest percentage of people living with HIV/AIDS?**

1. United States
2. India
3. Austria
4. **Swaziland**

**Post 19. Which of the following statements is true?**

1. You can catch HIV from a mosquito bite.
2. **HIV infections are preventable.**
3. There is a vaccine for HIV.
4. You can tell if a person has HIV by his or her appearance.

**FACTOR IV**

**Post 3. Approximately how many people worldwide were living with HIV in 2009?**

1. 300,000
2. 3,000,000
3. **30,000,000**
4. 300,000,000

**Post 7. What does the abbreviation “HIV” signify?**

1. Haploid immunity vector
2. **Human immunodeficiency virus**
3. Haploid immunodeficiency vector
4. Human insufficiency virus

**Post 9. What does the HIV virus particle look like?**

1. **20-sided geometric form.**
2. Pyramid with 5 sides
3. Rectangular box with 6 sides
4. Smooth sphere

**Post 12. Which series of numbers demonstrates exponential growth?**

1. 1, 3, 5, 7, 9
2. **1, 2, 4, 8, 16**
3. 2, 3, 5, 7, 11
4. 1, 2, 3, 5, 8

**Post 17. What is a nanometer?**

1. Small version of a Geiger counter
2. One-thousandth of a meter
3. Instrument for measuring nanoparticles
4. **One-billionth of a meter**

**Post 18. What is the main job of an epidemiologist?**

1. **Study factors that affect the health of populations.**
2. Work in a laboratory with cells.
3. Vaccinate people in isolated locations.
4. Conduct research on the epidermis.

**NOT ALIGNED WITH ANY FACTORS**

**Post 6. Which normally rare cancer is often associated with AIDS?**

1. Squamous cell carcinoma
2. Mesothelioma
3. **Kaposi’s Sarcoma**
4. Leukemia

**Post 11. What is CD4+?**

1. Protein molecule
2. Type of cancer
3. Test for HIV
4. **Kind of cell**

**Post 13. Which of the following is an example of a prevalence rate?**

1. **Percentage of people with tuberculosis**
2. Ratio of adults to children
3. Total number of cases of flu
4. Number of infected cells
